# Supplementary material for: A rapid and highly sensitive strain-effect graphene-based bio-sensor for the detection of stroke and cancer bio-markers
Source: Royal Society of Chemistry journal article supplement (doi:10.1039/c8tb00404h), 2018-01-01
Supplement: c8tb00404h1.pdf [file c8tb00404h1.pdf]

## SUPPLEMENTARY INFORMATION

### **Rapid and highly sensitive strain-effect graphene-based bio-sensor for detection of stroke and cancer bio-markers**

Mein Jin Tan<sup>4</sup>, Han-Chi Pan<sup>3</sup>, Duo Lin,<sup>a,b</sup> Chinh-Yu Tseng,<sup>d</sup> Qi Feng Lim,<sup>c</sup> Mein Jin Tan,<sup>c\*</sup> Kien Voon Kong,<sup>d\*</sup>

<sup>a</sup>College of Integrated Traditional Chinese and Western Medicine, Fujian University of Traditional Chinese Medicine, Fuzhou, China,

<sup>b</sup>Fujian Normal University, Key Laboratory of OptoElectronic Science and Technology for Medicine, Ministry of Education, Fujian Provincial Key Laboratory for Photonics Technology, Fuzhou, China

<sup>c</sup>Institute of Material Research and Engineering, A\*STAR, Singapore,

<sup>d</sup>Department of Chemistry, National Taiwan University, Taiwan.

\*e-mail: Email: [joshstan83@gmail.com](mailto:joshstan83@gmail.com). and [kvkong@ntu.edu.tw](mailto:kvkong@ntu.edu.tw)

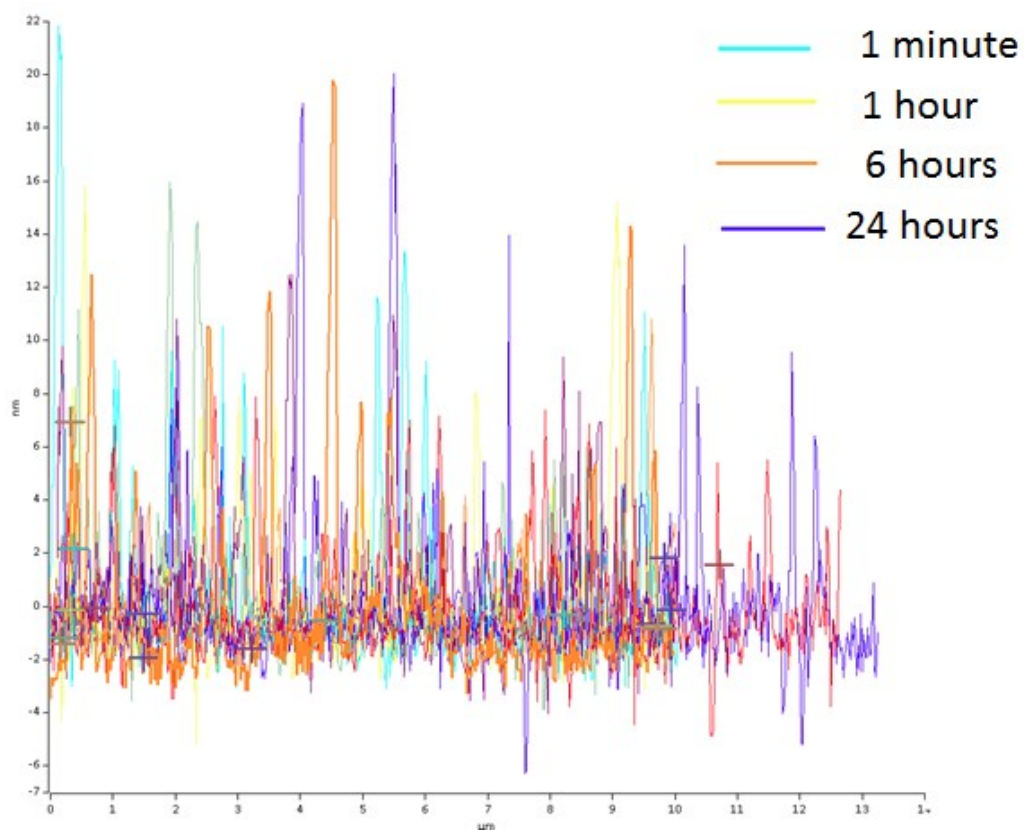

Figure S1. Height measurement of RuO<sub>2</sub> on MG by AFM.
